# Supplementary material for: An alumina stabilized ZnO–graphene anode for lithium ion batteries via atomic layer deposition
Source: Royal Society of Chemistry journal article supplement (doi:10.1039/c4nr02576h), 2014-01-01
Supplement: c4nr02576h1.pdf [file c4nr02576h1.pdf]

## Supporting Information for

# Alumina stabilized ZnO-graphene anode for lithium ion batteries via atomic layer deposition

Mingpeng Yu<sup>a</sup>, Aiji Wang<sup>b</sup>, Yinshu Wang<sup>b</sup>, Chun Li<sup>a</sup> and Gaoquan Shi<sup>\*a</sup>

<sup>a</sup>Department of Chemistry, Tsinghua University, Beijing 100084, People's Republic of China.

Fax: 86 62771149; Tel: 86 6277 3743; E-mail: gshi@tsinghua.edu.cn

<sup>b</sup>Department of Physics, Beijing Normal University, Beijing 100875, People's Republic of China.

### 1. Thermal atomic layer deposition (ALD) of ZnO and Al<sub>2</sub>O<sub>3</sub> onto G-aerogel

ZnO film was deposited onto G-aerogel by using an ALD system of SUNALE R200 (Picosun). Typically, a piece of G-aerogel was placed in the ALD chamber where zinc diethyl (Zn(C<sub>2</sub>H<sub>5</sub>)<sub>2</sub>, 99.9999%, Jiangsu Nata Opto-electronic Material Co. Ltd) reacted with H<sub>2</sub>O to form ZnO for 60 ALD cycles. Then, trimethylaluminium (Al(CH<sub>3</sub>)<sub>3</sub>, 99.9999%, Jiangsu Nata Opto-electronic Material Co. Ltd) reacted with H<sub>2</sub>O to form Al<sub>2</sub>O<sub>3</sub> via “*x*” ALD cycles, *x*= 0, 4, 10 or 20, respectively. The operational pressure of the ALD system was maintained at about 1800-2000 Pa throughout the deposition. Vapors of the two precursors for forming each oxide were alternately carried by N<sub>2</sub> gas into the reaction chamber and the temperature was kept at 150°C. The as-obtained ZnO-G-*x* (*x* refers to the number of ALD cycles used for depositing Al<sub>2</sub>O<sub>3</sub>) samples were treated by heating at 100°C under vacuum for 12 h before characterizations.

## 2. Supplementary figures

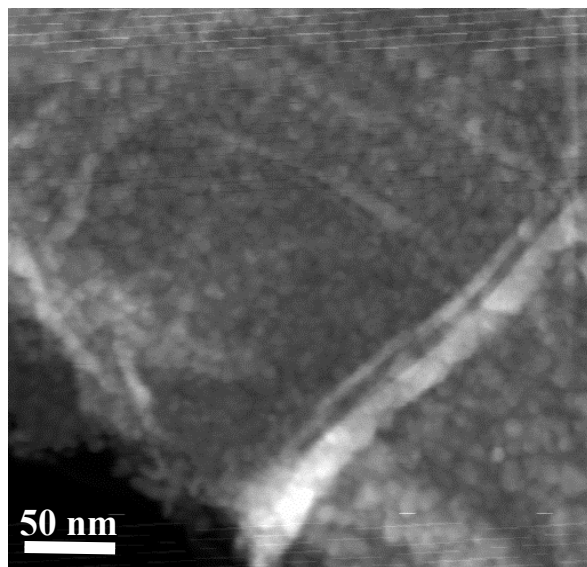

**Fig. S1** STEM image of ZnO-G-0 composite.

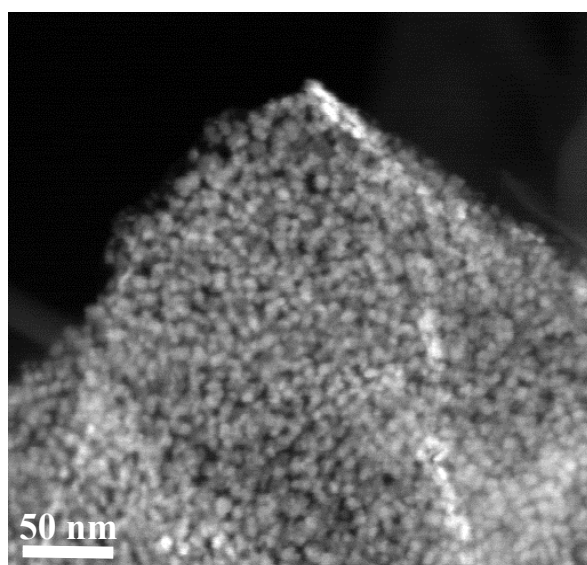

**Fig. S2** STEM image of ZnO-G-5 composite.

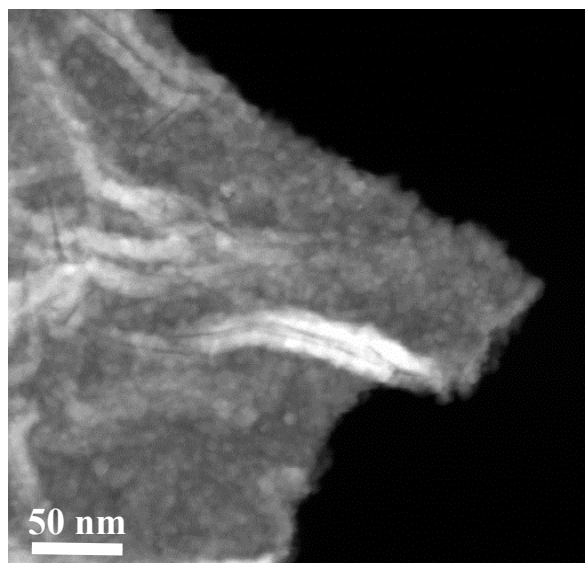

**Fig. S3** STEM image of ZnO-G-20 composite.

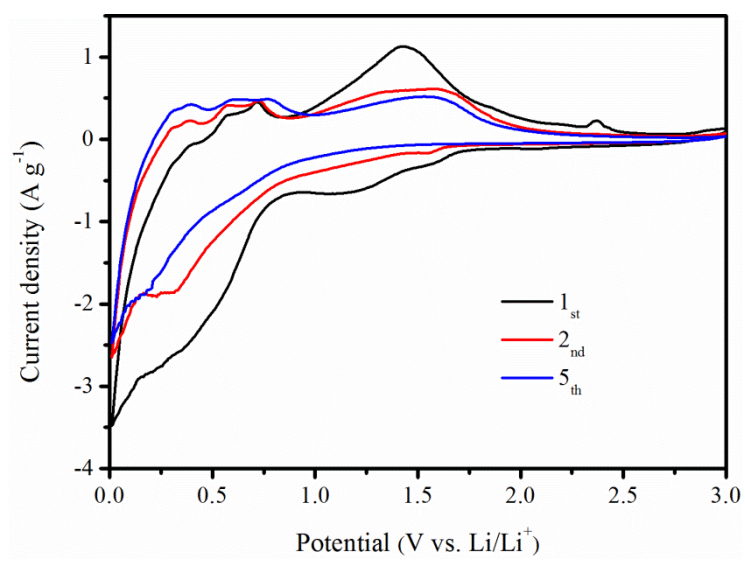

**Fig. S4** CV curves of ZnO-G-0 composite at  $0.1 \text{ mV s}^{-1}$ .

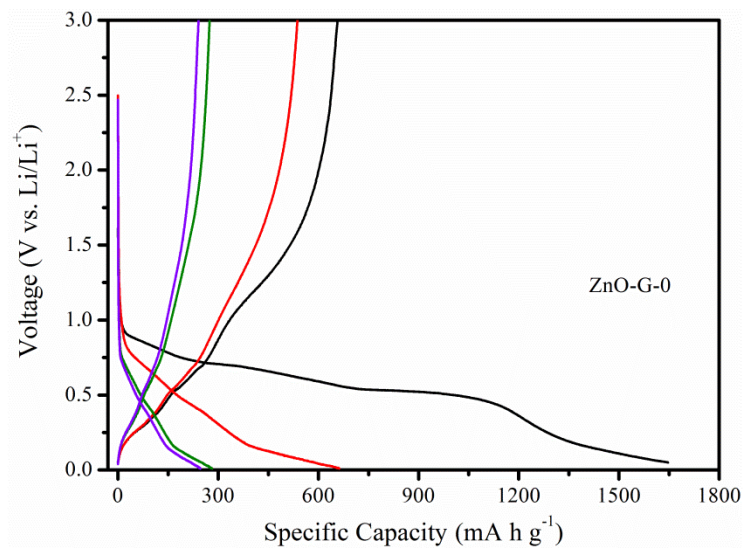

**Fig. S5** Galvanostatic charge/discharge curves of ZnO-G-0 composite at a current density of 100 mA g<sup>-1</sup>.

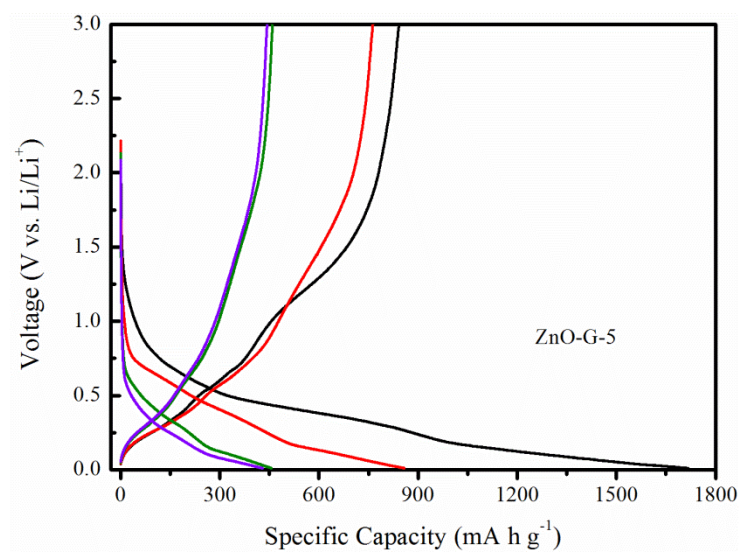

**Fig. S6** Galvanostatic charge/discharge curves of ZnO-G-5 composite at a current density of 100 mA g<sup>-1</sup>.

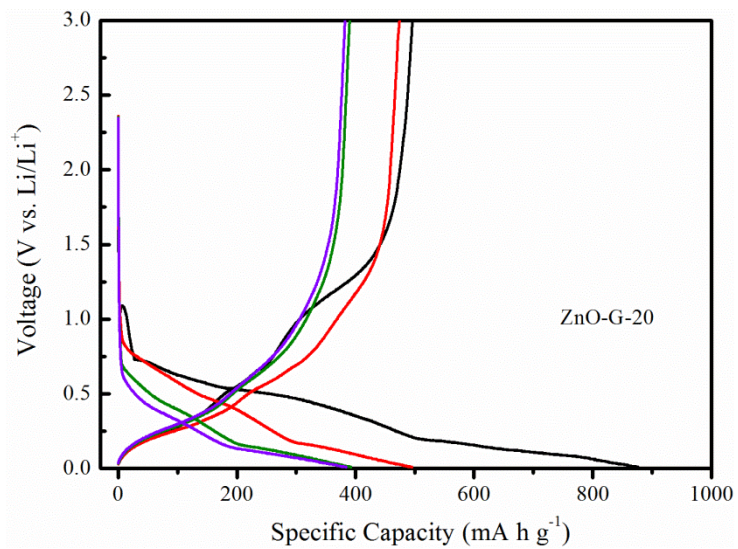

**Fig. S7** Galvanostatic charge/discharge curves of ZnO-G-20 composite at a current density of 100 mA g<sup>-1</sup>.

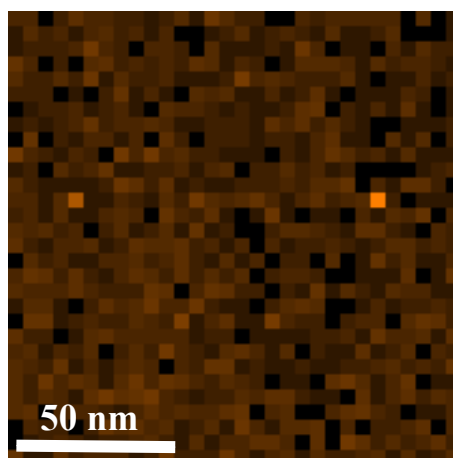

**Fig. S8** EDS mapping of Al element in ZnO-G-10 composites after 100 cycles of charging/discharging at 100 mA g<sup>-1</sup>.

**Table S1** Comparison of the electrochemical performances of different ZnO anode materials (1 C= 978 mA g<sup>-1</sup>, C<sub>dis</sub>=discharge capacity, C<sub>char</sub>=charge capacity, C<sub>rev</sub>= Reversible capacity).

| ZnO anode material                                     | 1 <sup>st</sup> C <sub>dis</sub><br>(mA h g <sup>-1</sup> ) | 1 <sup>st</sup> C <sub>char</sub><br>(mA h g <sup>-1</sup> ) | C <sub>rev</sub><br>(mA h g <sup>-1</sup> )                            | Ref          |
|--------------------------------------------------------|-------------------------------------------------------------|--------------------------------------------------------------|------------------------------------------------------------------------|--------------|
| ZnO/graphene                                           | 1235                                                        | 420                                                          | 300, 25 cycles<br>at 50 mA g <sup>-1</sup>                             | [1]          |
| Nanosized ZnO/Carbon                                   | 1550                                                        | 900                                                          | 700 after 100<br>cycles<br>at 100 mA g <sup>-1</sup><br>(based on ZnO) | [2]          |
| ZnO nanorod/Carbon                                     | 1150                                                        | 640                                                          | 330, 50 cycles<br>at 0.25 C                                            | [3]          |
| ZnO nanorod arrays                                     | 1461                                                        | 980                                                          | 310, 40 cycles<br>at 0.1 mA cm <sup>-2</sup>                           | [4]          |
| ZnO films                                              | 900                                                         | 400                                                          | 220, 40 cycles<br>at 20 μA cm <sup>-2</sup>                            | [5]          |
| ZnO/Ni                                                 | 1048                                                        | 786                                                          | 490, 30 cycles<br>at 80 mA g <sup>-1</sup>                             | [6]          |
| ZnO-C microsphere                                      | 1432                                                        | 798                                                          | 520, 150 cycles<br>at 100 mA g <sup>-1</sup>                           | [7]          |
| ZnO nanotube                                           | 932                                                         | 621                                                          | 386, 50 cycles<br>at 0.5 C                                             | [8]          |
| ZnO nanosheets                                         | 1120                                                        | 750                                                          | 400, 100 cycles<br>at 0.5 mA g <sup>-1</sup>                           | [9]          |
| ZnO/Se                                                 | 703                                                         | 505                                                          | 400, 100 cycles<br>at 5 μA cm <sup>-2</sup>                            | [10]         |
| ZnO/Au                                                 | 1280                                                        | 660                                                          | 392, 50 cycles<br>at 120 mA g <sup>-1</sup>                            | [11]         |
| ZnO/NiO/C                                              | 1235                                                        | 805                                                          | 488, 50 cycles<br>at 0.5 C                                             | [12]         |
| ZnO nanograins/graphene/Al <sub>2</sub> O <sub>3</sub> | 1513                                                        | 803                                                          | 490, 100 cycles<br>at 100 mA g <sup>-1</sup>                           | This<br>work |

[1] W. T. Song, J. Xie, S. Y. Liu, Y. X. Zheng, G. S. Cao, T. J. Zhu, X. B. Zhao, Graphene decorated with ZnO nanocrystals with improved electrochemical properties prepared by a facile in situ hydrothermal route, *Int. J. Electrochem. Sci.*, 7 (2012) 2164–2174.

[2] O. B. Chae, S. Park, J. H. Ryu, S. M. Oh, Performance Improvement of Nano-Sized Zinc Oxide Electrode by Embedding in Carbon Matrix for Lithium-Ion Batteries, *Journal of The Electrochemical Society*, 160 (2013) A11–A14.

[3] J. Liu, Y. Li, R. Ding, J. Jiang, Y. Hu, X. Ji, Q. Chi, Z. Zhu, X. Huang, Carbon/ZnO Nanorod Array Electrode with Significantly Improved Lithium Storage Capability, *The Journal of Physical Chemistry C*, 113 (2009) 5336–5339.

- [4] H. Wang, Q. Pan, Y. Cheng, J. Zhao, G. Yin, Evaluation of ZnO nanorod arrays with dandelion-like morphology as negative electrodes for lithium-ion batteries, *Electrochimica Acta*, 54 (2009) 2851–2855.
- [5] Z. W. Fu, F. Huang, Y. Zhang, Y. Chu, Q. Z. Qin, The electrochemical reaction of zinc oxide thin films with lithium, *Journal of The Electrochemical Society*, 150 (2003) A714–A720.
- [6] C. Zhang, J. Tu, Y. Yuan, X. Huang, X. Chen, F. Mao, Electrochemical performances of Ni-coated ZnO as an anode material for lithium-ion batteries, *Journal of The Electrochemical Society*, 154 (2007) A65–A69.
- [7] Q. Xie, X. Zhang, X. Wu, H. Wu, X. Liu, G. Yue, Y. Yang, D. L. Peng, Yolk-shell ZnO-C microspheres with enhanced electrochemical performance as anode material for lithium ion batteries, *Electrochimica Acta*, 125 (2014) 659–665.
- [8] K. T. Park, F. Xia, S. W. Kim, S. B. Kim, T. Song, U. Paik, W. I. Park, Facile synthesis of ultrathin ZnO nanotubes with well-organized hexagonal nanowalls and sealed layouts: applications for lithium ion battery anodes, *The Journal of Physical Chemistry C*, 117 (2013) 1037–1043.
- [9] X. H. Huang, X. H. Xia, Y. F. Yuan, F. Zhou, Porous ZnO nanosheets grown on copper substrates as anodes for lithium ion batteries, *Electrochimica Acta*, 56 (2011) 4960–4965.
- [10] Y. N. Zhou, W. J. Li, Z. W. Fu, Electrochemical reactivity of nanocomposite ZnO–Se for lithium-ion batteries, *Electrochimica Acta*, 59 (2012) 435–440.
- [11] M. Ahmad, S. Yingying, A. Nisar, H. Sun, W. Shen, M. Wei, J. Zhu, Synthesis of hierarchical flower-like ZnO nanostructures and their functionalization by Au nanoparticles for improved photocatalytic and high performance Li-ion battery anodes, *Journal of Materials Chemistry*, 21 (2011) 7723–7729.
- [12] Q. Pan, L. Qin, J. Liu, H. Wang, Flower like ZnO-NiO-C films with high reversible capacity and rate capability for lithium ion batteries, *Electrochimica Acta*, 55 (2010) 5780–5785.
